# Supplementary material for: Ionospheric influence on the seismo-telluric current related to electromagnetic signals observed before the Wenchuan M S = 8.0 earthquake
Source: Copernicus journal article supplement (doi:10.5194/se-2016-89), 2016-06-30
Supplement: Supplementary file [file se-2016-89-RC1-supplement.pdf]

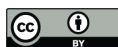

1     **Ionospheric influence on the seismo-telluric current related to electromagnetic**  
2             **signals observed before the Wenchuan  $M_S=8.0$  earthquake**

3

4                             Mei Li<sup>1,2</sup>, Handong Tan<sup>2</sup> and Meng Cao<sup>2</sup>

5

6     (1) China Earthquake Networks Center, China Earthquake Administration, No.5,  
7             Sanlihe Nanhengjie, Xicheng District, 100045 Beijing, China.

8     (2) China University of Geosciences, No.29, Xueyuan Road, Haidian District, 100083  
9             Beijing, China.

10

11     Corresponding author: Handong Tan, China University of Geosciences, No.29,  
12             Xueyuan Road, Haidian District, 100083 Beijing, China. (thd@cugb.edu.cn)

13

14     **Abstract.** A three-layer (Earth-air-ionosphere) physical model, as well as a  
15     two-layer (Earth-air) model, is employed in this paper to investigate the ionospheric  
16     effect on the wave fields for a finite length dipole current source co-located with the  
17     main fault of an earthquake when the transmitter-receiver distance is up to one  
18     thousand kilometers or even more. The results show that all electrical fields are free  
19     of the ionospheric effect for different frequencies in a relative short range, e.g.,  $\sim 300$   
20     km for  $f=1$  Hz, implying the ionospheric influence on electromagnetic fields can be  
21     neglected within this range that becomes smaller as the frequency increases. However,  
22     the ionosphere can give a constructive interference to the waves passed through and  
23     make them decay slowly when an observation is out of this range and the ionospheric  
24     effect can be up to 1-2 magnitudes of the electrical fields. For an observed 1.3 mV/m  
25     signal at 1,440 km away for the Wenchuan  $M_S=8.0$  earthquake, the expected  
26     seismo-telluric current magnitude for the Earth-air-ionosphere model is of  $5.0 \times 10^4$   
27     kA, which is of one magnitude smaller than the current value of  $3.7 \times 10^5$  kA obtained  
28     by the Earth-air model free of ionospheric effect. This indicates that the ionosphere  
29     facilitates the electromagnetic wave propagation, as if the detectability of the system  
30     is improved effectively and it is easier to record a signal even for stations located at  
31     distances beyond their detectability threshold.

32     **Keywords.** Ionospheric influence on electromagnetic waves; The Wenchuan  
33     earthquake; Seismo-telluric current

34

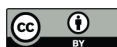

## 35 1 Introduction

36 The fact that Electro-Magnetic (EM) emissions accompany every stage of large  
37 earthquake preparations seems undebatable although short-term earthquake prediction  
38 is still one of the most challenging targets in Earth science today (Eftaxias et al.,  
39 (2002). Meanwhile, the Ultra-Low Frequency (ULF) band is of particular interest  
40 because only EM signals in the ULF range and at lower frequencies originated in the  
41 Earth's crust can be easily recorded at the Earth's surface without significant  
42 attenuation comparing with 'high' frequency emissions that might be emitted at  
43 epicenter depths at more than 10 km, even several hundreds of kilometers. Recently,  
44 ULF electromagnetic anomalous phenomena related to strong earthquakes have been  
45 investigated and reported in increasing numbers. Two notable examples are the Loma  
46 Prieta  $M_s=7.1$  earthquake on October 17, 1989 (Fraser-Smith et al., 1990; Bernardi et  
47 al., 1991), as well as the Spitak  $M_s=6.9$  earthquake on December 7, 1988 [Molchanov  
48 et al., 1992; Kopytenko et al., 1993). It was found that, these two earthquakes have  
49 very similar electromagnetic emission fluctuation characteristics. The intensity of the  
50 signals began to increase 3-5 days before the earthquake at Spitak and 12 days before  
51 that at Loma Prieta. The most important point is the electromagnetic emissions  
52 exhibited a maximum 4 h before the Spitak event ( $f=0.005-1$  Hz,  $D=200$  km,  $A=0.2$   
53 nT) and 3 h before the Loma Prieta event ( $f=0.01-10$  Hz,  $D=7$  km,  $A=1.5$  nT).

54 A more recent example reported by Li et al. (2013) is the Wenchuan  $M_s=8.0$   
55 earthquake on May 12, 2008, a typical mid-crust, which resulted in great devastation  
56 and 69,000 deaths. This earthquake was preceded by more than one month of  
57 increasing anomalous ULF emissions with a climax starting on May 9, three days  
58 before the Wenchuan main shock ( $f=0.1-10$  Hz,  $D=1,440$  km,  $A=1.3$  mV m<sup>-1</sup>).

59 Many simulating rock-pressure experiments were carried out in order to  
60 understand the producing mechanism of the electromagnetic information associated  
61 with seismic activities. Laboratory experiments by Qian et al., (1996; 2003) and Hao  
62 et al. (2003) demonstrate that, electromagnetic signals are always recorded when rock  
63 samples are subjected to dynamic stresses. There is a close relationship between the  
64 produced signal and the formation of micro-cracks in the rock. Furthermore, the  
65 climax of the signal occurred when the main rupture happened and the magnetic  
66 pulses of shorter-period appearing at the last stage of the experiment may be induced  
67 by instantaneous electric current of the accumulated charge during the cracking  
68 acceleration. Strong electromagnetic signals are generated while rock samples were



69 fracturing (Panfilov, 2014). As rocks upon stressing, dislocations are generated that  
70 sweep through the mineral grains and break the peroxy links. The positive holes are  
71 activated as charge carriers, and have the remarkable capability to flow out of the  
72 stressed sub-volume and spread into the surrounding unstressed rocks. This situation  
73 can be considered as analogous to a battery ~~which generates~~ electric currents ~~along~~  
74 the stress-gradient direction (Freund, 2002; Freund and Sornette, 2007; Freund, 2009,  
75 2010). A gabbro sample ( $30 \times 15 \times 10 \text{ cm}^3$ ) from Shanxi, China, ~~came into~~  
76 a 55 nA current recorded about 2 seconds before failure, with the load being at about  
77 30,000 lbs and the maximum spike reaches 450 nA when the main failure took place  
78 (Freund, 2009). Up to now, no clear explanation has been given although several  
79 physical mechanisms have been proposed to interpret the generation of EM emissions  
80 and electrical currents observed either during seismic activity or in the laboratory  
81 experiments. These include the electrokinetic and magnetohydrodynamic,  
82 piezomagnetism, stress-induced variations in crustal conductivity, microfracturing,  
83 and so on (Draganov et al., 1991; Park, 1996; Fenoglio et al., 1995; Egbert, 2002;  
84 Simpson and Taflove, 2005). Whatever the physical mechanism of electromagnetic  
85 generation is, it is well established that, during rock experiments conducted under  
86 laboratory conditions, a strong electrical current is produced when rocks are stressed,  
87 especially at the stage of the main rupture. So, like what Bortnik et al. (2010) wanted  
88 to know, what is the electrical current necessary to produce an observable magnetic  
89 signal on the ground, at a given distance from the epicenter and for an assumed  
90 ground conductivity? In their work, an infinitesimally short ~~horizontal~~ dipole located  
91 at a hypocenter depth in the half-space (Earth) is used to estimate the magnitude of  
92 the seismo-telluric current required for the “Alum Rock”  $M_W=5.6$  earthquake on  
93 October 31, 2007. The observable electromagnetic ground signals ( $f=1 \text{ Hz}$ ,  $D=2 \text{ km}$ ,  
94  $A=30 \text{ nT}$ ) and the results show that for an observed 30 nT pulse at 1 Hz, the expected  
95 seismo-telluric current magnitudes fall in the range  $\sim 10\text{--}100 \text{ kA}$ .

96 Unlike a parameter of the “Alum Rock”  $M_W=5.6$  earthquake ( $D=2 \text{ km}$ ), the  
97 distance between the epicenter of the Wenchuan  $M_S=8.0$  earthquake and the observing  
98 station is  $D \sim 1,440 \text{ km}$  (Li et al., 2013), i.e. several times ~~higher~~  
99 ~~bottom~~ of ionosphere ( $h \sim 85\text{--}100 \text{ km}$ ) (Kuo et al., 2011; Cummer, 2000; Yamauchi et  
100 al., 2007). When we investigate electromagnetic emissions induced by an electrical  
101 current or a magnetic moment on the surface or beneath the Earth, the effect of the  
102 medium air, crustal as well as ionosphere should be taken into account because of

the way peroxy are  
being introduced here  
does not instill  
confidence. I'll  
comment separately



103 these three media being of different conductivities and so we need to consider a  
104 lithosphere-atmosphere-ionosphere electromagnetic coupling. The ionosphere plays  
105 an important role in radio propagation at Extremely Low Frequency (ELF) and Very  
106 Low Frequency (VLF), the ground and the ionosphere are good electrical conductors  
107 and form a spherical Earth-ionosphere waveguide (Cummer, 2000). In addition, in the  
108 magneto-telluric (MT) method, widely used in ~~exploring~~ petroleum or mine, the  
109 ionospheric influence on electromagnetic (EM) fields should be considered when the  
110 ~~transmitter-receiver~~ distance of a large-scale and large-power fixed ~~resource~~ is up to  
111 one thousand kilometers. EM fields can be strengthened in the ionosphere as it is  
112 shown when we use analytical solutions of Maxwell equations, as well as numerical  
113 ones of the “Earth-ionosphere” mode with a source on the ground or ~~in the air~~ (Fu et  
114 al., 2012; Li et al., 2010a; Li et al., 2010b; Xu et al., 2012; Li et al., 2011). Therefore,  
115 comparing with an electromagnetic attenuation without ionospheric effect, the point is  
116 to evaluate the ionospheric influence on the electromagnetic propagation when the  
117 transmitter-receiver distance is up to one thousand kilometers or even more.  
118 Furthermore, the comparison between the observation distance ( $D=1,440$  km) and the  
119 length of the Wenchuan earthquake main rupture  $L\sim 150$  km (Zhang et al., 2009)  
120 indicates that the length of the dipole source is not negligible. So in this paper, using  
121 the work of Key (2009), a three-layer (Earth-air-ionosphere) physical model, as well  
122 as a two-layer (Earth-air) model, containing a finite length dipole current source  
123 co-located along the fault and beneath the Earth is introduced in Sect. 2. For specified  
124 parameters, some simulation results of the dipole source with and without ionospheric  
125 effect are given in Sect. 3. In Sect.4, we define and limit our assumed parameter  
126 values, present the results for the Wenchuan earthquake case. Discussion and  
127 conclusions are given in Sect. 5 and Sect.6, respectively.

128

## 129 **2 Description of the modeling methodology**

130 In order to study the electromagnetic fields emitted by a long dipole current  
131 source, the approach used here follows the magnetic vector potential formulation  
132 described in Wait (1982) and developed by Key (2009), who generalized the  
133 formulation to allow for multiple layers above the transmitter (in addition to multiple  
134 layers below). He used exponential forms for the recursions rather than hyperbolic  
135 functions in isotropic media, which consists of  $N$  layers of isotropic conductivity  $\sigma_i$   
136 where  $i = 1, \dots, N$ , and which uses a right-handed coordinate system with the  $z$  axis

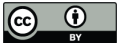

137 pointing down. Assuming a time-harmonic source with  $e^{-i\omega t}$  time dependence,  
 138 negligible magnetic permeability  $\mu$  variations, and angular frequencies  $\omega$  that are  
 139 low enough so that displacement currents can be neglected, Maxwell's equations are

$$\nabla \times \mathbf{E} = i\omega \mathbf{B}, \quad (1)$$

141 and

$$\nabla \times \mathbf{B} = \mu\sigma \mathbf{E} + \mu \mathbf{J}_s. \quad (2)$$

143 Expression  $\mathbf{J}_s = \mathbf{I}\delta(\mathbf{r} - \mathbf{r}_0)$  is the imposed electric dipole source at position  $\mathbf{r}_0$  with  
 144 vector moment  $\mathbf{I}$ , and here is restricted to an infinitesimal dipole with unit moment.

145

146

147

148

149

150

151

152

153

154

155

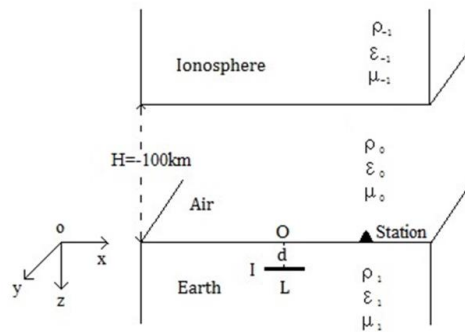

this figure would make intuitively more sense if the available space on the page were used to increase the horizontal distance between O and "Station" to several times the vertical distance H=100km. This would allow visualize propagation of the EM wave in the waveguide

156 **Fig.1.** An x-directed dipole current source, with its central coordinate  $(0, 0, d)$ , is placed in the  
 157 bottom medium (Earth) of a three layer modeling (Earth-air-ionosphere model), where  $z$  is defined  
 158 positive in the downward direction.

159

160 Based on the model set up by Key (2009), some modifications will be done in  
 161 this study in order to answer the questions illustrated above. A physical model is  
 162 specified. It has three layers, Earth, air and ionosphere, which is called  
 163 Earth-air-ionosphere model. Its coordinate system is denoted in Fig.1 with  $z$ -direction  
 164 being downward. An x-directed dipole of a length  $L$  and a current  $I$  is placed in the  
 165 bottom medium (Earth:  $z > 0$ ), which is homogeneous and has the electrical  
 166 properties: magnetic permeability  $\mu_1$ , permittivity  $\epsilon_1$ , and conductivity  $\sigma_1$ . The  
 167 middle medium (air:  $-100 \text{ km} < z < 0$ ) is described by its electrical properties  $\mu_0$ ,  
 168  $\epsilon_0 (= 8.854 \times 10^{-12} \text{ Farad m}^{-1})$  and  $\sigma_0 (= 10^{-14} \text{ S m}^{-1})$ . The top medium  
 169 (ionosphere:  $z < -100 \text{ km}$ ) is characterized by electrical properties  $\mu_{-1}$ ,  $\epsilon_{-1}$  and  
 170  $\sigma_{-1} (= 10^{-5} \text{ S m}^{-1})$ .



Something is wrong here: according to Figure 1 the Earth medium is at  $z < 0$  and the air medium is at  $z > 0$ .

171 As a comparison, a two-layer model (Earth-air model) including in Earth  
 172 medium ( $z > 0$ ), as well as air medium ( $z < 0$ ), is also established during the study.  
 173 All the corresponding parameters described are the same as these of  
 174 Earth-air-ionosphere model.

175 We assume that the total space is non-magnetic and that the magnetic  
 176 permeability  $\mu$  variations are negligible in the different layers, i.e.  $\mu_1 = \mu_0 = \mu_{-1} =$   
 177  $4\pi \times 10^{-7}$  Farad  $m^{-1}$ . However, the ionosphere as the electrically conducting  
 178 section of the upper atmosphere ~~play a so~~ important role ~~on~~ the electromagnetic  
 179 propagation that we set  $\epsilon_{-1} = 5\epsilon_0$  when an ionospheric effect on electromagnetic  
 180 transmission is taken into consideration. On the same manner we have  $\epsilon_1 = \epsilon_0 =$   
 181  $8.854 \times 10^{-12}$  Farad  $m^{-1}$ , i.e.  $\epsilon_i$  is not considered as zero during all calculations.  
 182 Under these conditions, the formula listed above are still suitable and more  
 183 explanations about the potential formulation of a horizontal electric dipole can be  
 184 found in the Appendix A of Key (2009) and related programs are available with an  
 185 access to the website (<http://marineemlab.ucsd.edu/>). The horizontal finite length  
 186 dipole source can be ~~seen~~ as an integral of an infinite small horizontal dipole during  
 187 related calculations.

188

### 189 3 Simulation results

190 According to these two models ~~built~~ above, several free parameters must be  
 191 specified in order to investigate the attenuation characteristics of the electromagnetic  
 192 fields emitted by a long x-directed dipole current source. As for the parameters of the  
 193 dipole current source, we select  $L=150$  km, the Wenchuan earthquake main rupture  
 194 stage within 30 s out of 90 s ( $\sim 300$  km) based on Zhang et al., (2009, Fig.1), the  
 195 depth  $d=19$  km (Xu, 2009), the hypocenter depth of the Wenchuan case and the  
 196 current is set to be  $I=1$  A temporarily. Here, the Earth is considered to be an isotropic  
 197 media with an average conductivity  $\sigma_1$ , and we assume  $\sigma_1 = 1.0 \times 10^{-3}$  S  $m^{-1}$  at  
 198 this time, i.e.  $\rho_1 = 10^3$  ohm  $\cdot$  m, although the ground conductivity depends not only  
 199 on the local petrology, but also on the porosity, temperature, and pressure (e.g., Wait,  
 200 1966). All these parameters are common to two models. ~~While the~~ parameter  
 201  $\epsilon_{-1} = 5\epsilon_0$  is of most importance during the calculation in three-layer model in that it  
 202 potentially can affect the transmission of electromagnetic waves produced by the  
 203 dipole beneath the Earth, and possibly ~~induces~~ the Earth-atmosphere-ionosphere  
 204 electromagnetic coupling.



205

206

207

208

209

210

211

212

213

214

215

216

217

218

219

220

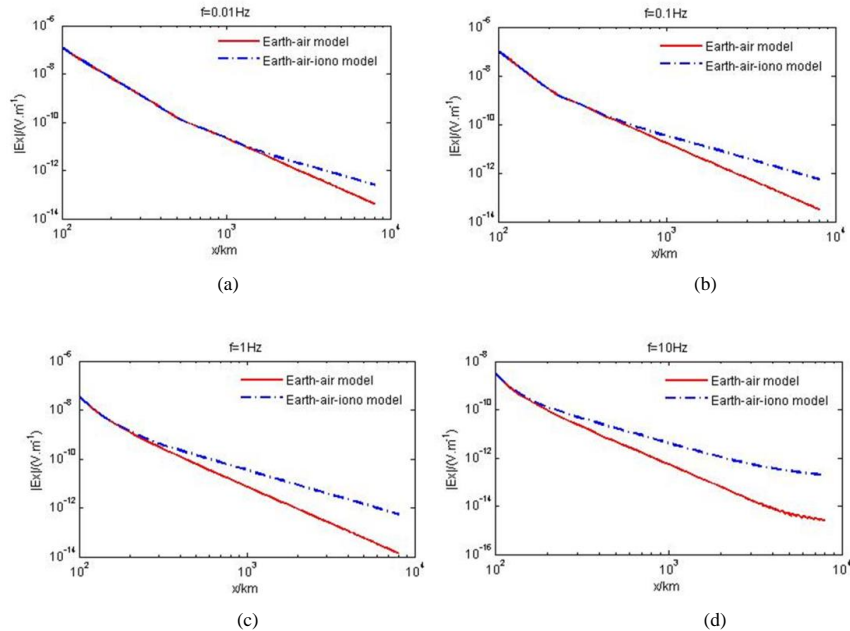

221

222

223

224

225

226

227

228

229

230

231

232

233

234

235

236

237

238

**Fig.2.** Electric field  $|E_x|$  decay curves along x-axial direction as a function of the observing distance for the Cartesian coordinate system with different frequencies. Red solid lines stand for electric field curves for Earth-air model and blue dot lines denote electric field curves with the ionospheric effect for Earth-air-ionsphere model.

(a) Total  $|E_x|$  for  $f=0.01$  Hz;    (b) Total  $|E_x|$  for  $f=0.1$  Hz;

(c) Total  $|E_x|$  for  $f=1$  Hz;    (d) Total  $|E_x|$  for  $f=10$  Hz;

Fig.2a-d displays electric field component amplitude  $|E_x|$  decay curves along the x-axial direction with the frequencies  $f=0.01$  Hz,  $f=0.1$  Hz,  $f=1$  Hz, and  $f=10$  Hz respectively for the Cartesian coordinate system up to  $\sim 10,000$  km on the Earth's surface.

It can be seen from Fig.2a-d, first, the electrical field with “high” frequency has a big attenuation although all curves for both Earth-air model (red solid lines) and Earth-air-ionsphere model (blue dot lines) decay rapidly as the distance increases. Second, each group of curves run at the same level for one fixed frequency, e.g.,  $f=1$  Hz, when an observing point is located at a relative near distance,  $\sim 300$  km for  $f=1$  Hz (Fig.2c) for example. That is to say, the ionospheric influence on electromagnetic field transmissions can be neglected within this range. However this range changes

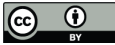

239 for different frequencies and it becomes smaller as the operating frequency of the  
 240 current source increases (e.g., more than 1000 km for  $f=0.01$  Hz (Fig.2a) and only  
 241  $\sim 200$  km for  $f=10$  Hz (Fig.2d)). Third, the most important result is, as the distance  
 242 increases, field curves with an ionospheric effect (blue dot lines) run by a different  
 243 way from that of curves without an ionospheric effect (red solid lines) and the  
 244 ionospheric lines attenuate more slowly. Now, this kind of ionospheric influence  
 245 cannot be neglected at this time anymore. The ionospheric difference is about 1  
 246 magnitude ( $\times 10$ ) for all the frequencies listed and even once up to 2 magnitudes for  
 247  $f=10$  Hz within the range shown in Fig.2. For example, the ionospheric difference  
 248 value shows 1 magnitude from  $\sim 840$  km, up to 2 magnitudes from  $\sim 3,700$  km for  
 249  $f=10$  Hz (Fig.2d).

250

#### 251 4 The Wenchuan $M_S=8.0$ earthquake as a sample

##### 252 4.1 Estimating the seismo-telluric current magnitude

253

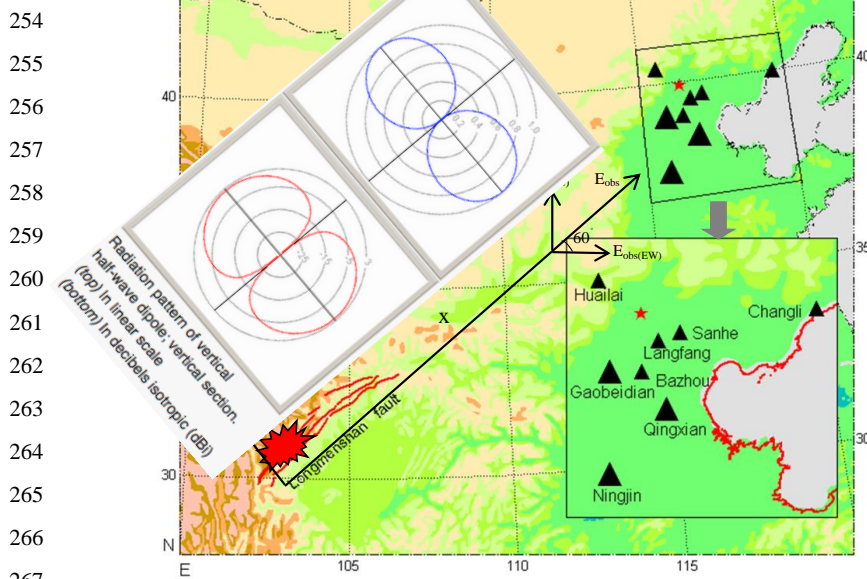

with the geometry shown  
 the intensity of the EM  
 emission perpendicular to  
 the Longmenshan fault  
 should be much higher as  
 indicated in the graphics  
 pasted into your figure.  
 Any comment?

268 **Fig.3.** Distribution of the Wenchuan earthquake epicenter and observation stations. Black solid  
 269 triangles present the related locations of observation stations in Hebei electromagnetic observation  
 270 network, bigger ones indicate the stations where abnormal information was recorded and the red  
 271 star denotes Beijing (Li et al., 2013, Fig.1). A ground surface coordinate system is added.

272



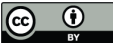

273 On the base of the work of rock experiments conducted under laboratory  
274 conditions, there is a reason to believe that a giant seismo-telluric current is generated  
275 when the main rupture took place during the Wenchuan earthquake on 12 May 2008  
276 and that this current mainly propagates along the Longmenshan fault. At the same  
277 time a strong electrical field induced by this current suddenly increased. This  
278 electrical field was recorded at the ground-based Gaobeidian observing station, 1440  
279 km away from the epicenter of the shock, with a SN maximum amplitude of 70 mm,  
280 i.e.  $1.3 \text{ mV m}^{-1}$  (Li et al., 2013), that is  $E_{\text{obs(SN)}} = 1.3 \text{ mV m}^{-1}$  in the following  
281 statement (Fig. 3).

what does "SN"  
mean? Signal-to-  
Noise?

282 In order to establish a relationship between the seismo-telluric current during the  
283 main event and the observable ground electrical signals registered at Gaobeidian  
284 station, we consider that a finite length current dipole source, with the length being  
285 the main rupture  $L=150 \text{ km}$  of the Wenchuan earthquake and the current  $I$ , is  
286 co-located with the Longmenshan main fault (x-direction), with the depth being  $d=19$   
287 km. Then one can refer to Fig.1 with ionospheric effect.

288 A coordinate system on the Earth's surface (see Fig.3) is set up to calculate the  
289 observable electrical field along the x-direction  $E_{\text{obs}}$  according to the electrical value  
290  $E_{\text{obs(SN)}}=1.3 \text{ mV m}^{-1}$  recorded at the Gaobeidian station. The Gaobeidian station lies in  
291 the extended line of the Longmenshan fault, which trends northeast and dips about  
292  $60^\circ$  west (Xu, 2009). Other locations of stations are shown in Fig.1 of Li et al. (2013)  
293 and here they are shown in Fig.3 which includes a ground surface coordinate system.  
294 From Fig.3, we see that the electrical field component intensity along the x-direction  
295 is about  $|E_x|=E_{\text{obs}}=1.5 \text{ mV m}^{-1}$  ( $E_{\text{obs(SN)}}=\sin 60^\circ \times E_{\text{obs}}=1.3 \text{ mV m}^{-1} \rightarrow E_{\text{obs}}=1.5 \text{ mV}$   
296  $\text{m}^{-1}$ ).

297 As the observing frequency of the electromagnetic observation system is 0.1-10  
298 Hz and the recorder belongs to a real-time analog record, it is not easy to finger out  
299 the right frequency of the signals registered at the Gaobeidian station during the  
300 maximum stage prior to the Wenchuan earthquake. We set the main frequency  $f=1 \text{ Hz}$   
301 during our calculations although the information is of a short period  $\sim 0.1-0.3 \text{ s}$  and a  
302 large amplitude  $\sim 1.3 \text{ mV m}^{-1}$  (Li et al., 2013) and frequency bands (0.4-3 s and  
303 0.05-0.1 s) with various amplitudes were observed (Guan et al., 2003). At the same  
304 time, the results of 2D MT inversion in the Longmenshan fault show that the apparent  
305 resistivity logarithm is  $\sim 1-4.8$  (Zhu et al., 2008) and it is a wide range.

306



307  
 308  
 309  
 310  
 311  
 312  
 313  
 314  
 315  
 316  
 317  
 318

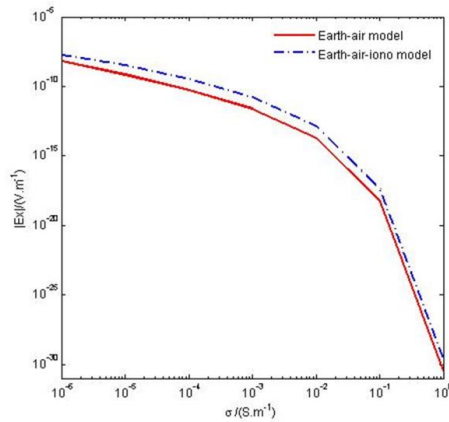

319 **Fig.4.** The calculated value of  $|E_x|$ , expected at the observation location (1,440 km, 0, 0) due to a  
 320 dipole source of  $L=150$  km,  $I=1$  A,  $f=1$  Hz and  $d=19$  km (Fig.1), as a function of the typical  
 321 crustal materials conductivity  $\sigma$  both in Earth-air model (red line) and in Earth-air-ionsphere  
 322 model (blue dot line).  
 323

324 Fig. 4 shows the calculated values of  $|E_x|$ , expected at the observation location  
 325 (1,440 km, 0, 0) due to a dipole source of  $L=150$  km,  $I=1$  A and  $d=19$  km (Fig.1), as a  
 326 function of the typical crustal materials conductivity  $\sigma$ . Comparing with the red line  
 327 with the blue dot one, the ionospheric effect is clearly displayed throughout the  
 328 variation of the crustal conductivity. A rapid attenuation (exceed 20 orders) of the  
 329 field values indicates the importance of the conductivity  $\sigma$ . It is difficult to specify the  
 330 average conductivity  $\sigma$  (referred to as  $\sigma_1$  in the context) of the homogeneous Earth  
 331 medium, even for the typical Wenchuan area. However, combined with  $f=1$  Hz here,  
 332 the skin-depth depends on the conductivity  $\sigma$ , given by the formula  $\delta = (\pi f \mu_0 \sigma)^{-\frac{1}{2}}$ .  
 333 Taken the depth  $d=19$  km into account, here  $\delta = d = 19$  km and the calculated  $\sigma_1$   
 334 is attained, i.e.  $\sigma_1 = 7.0 \times 10^{-4} \text{ S m}^{-1}$ , which is advantageous to radiate  
 335 electromagnetic waves within this depth.

336 Using the same parameters as above, the simulation results show that the  
 337 seismo-telluric current along the main fault needed to produce an electrical ground  
 338 signal  $E_{\text{obs(SN)}} = 1.3 \text{ mV m}^{-1}$  at the Gaobeidian station when the Wenchuan event  
 339 occurred, is about  $5.3 \times 10^4$  kA with the ionospheric effect and  $3.7 \times 10^5$  kA without the  
 340 ionospheric effect. As it is expected, these two results have one order ( $\times 10$ )

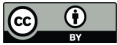

341 difference from each other. While the former is more reasonable under this conditions  
342 because the seismo-telluric current produced by the Wenchuan main rupture is  
343 specified.

#### 344 4.2. Detectability under the ionospheric effect

345 Now according to the Wenchuan earthquake example, the seismo-telluric current  
346 source ( $f=1$  Hz,  $d=19$  km,  $L=150$  km, and a current  $I=5.3\times 10^4$  kA considering the  
347 Earth-air-ionosphere model) is thought of as a powerful finite length dipole source.

348 Fig.5 displays the fluctuations of the surface electrical fields with and without  
349 ionospheric effect for the Wenchuan source along x-axial direction. It shows no  
350 obvious ionospheric effect within 300 km, while this effect is roughly up to 1  
351 magnitude from  $\sim 800$  km. The gap becomes larger as the distance extends, 2  
352 magnitudes from  $\sim 4000$  km, and then it keeps this gap till 10,000 km. Under this  
353 condition, considering the observable signal  $1.5 \text{ mV m}^{-1}$  at Gaobeidian station before  
354 the Wenchuan epicenter, the distance recorded such a signal must be  $\sim 1500$  km  
355 (blue arrow) with ionospheric effect, or it is only  $\sim 800$  km (red arrow) without  
356 ionospheric effect. So the ionosphere facilitates the electromagnetic wave propagation,  
357 as if the detectability of the system is improved effectively and it is easier to record a  
358 signal even for stations located at distances beyond their detectability threshold.

359

360

361

362

363

364

365

366

367

368

369

370

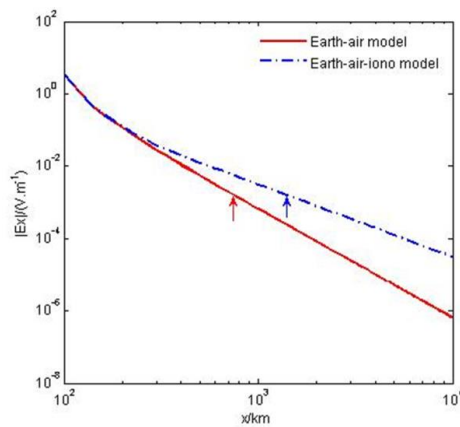

371 **Fig.5.** The Wenchuan source producing electric field  $|Ex|$  decay curves as a function of the  
372 distance along x-axial direction with ionospheric effect (blue dot line), as well as without  
373 ionospheric effect (red line). The electric field  $|Ex|=1.5 \text{ mV m}^{-1}$  is labeled by a red arrow and a  
374 blue one respectively.



## 375 5 Discussion

376 In very recent years, there is an increasing amount of evidence that during some  
377 last stages of the long term process of preparation, there could be a transfer of energy  
378 between lithosphere and the above layers of atmosphere and ionosphere, so as to  
379 introduce the concept of a lithosphere–atmosphere–ionosphere coupling (LAIC)  
380 among the three involved layers of the Earth system (Pulinets et al., 2000; Hayakawa  
381 and Molchanov, 2002; Molchanov et al., 2004; Pulinets and Ouzounov, 2011). On  
382 one hand, the ‘energy source’ is usually thought to be beneath the Earth and related  
383 with tectonic activities in the lithosphere. On the other hand, numerous rock-pressure  
384 experiments and electromagnetic observations associated with seismic activities have  
385 already proved that a giant electrical current and an abrupt increase of electromagnetic  
386 signals are motivated when the main rupture occurs for stressed-rocks. These  
387 phenomena happened on May 9 2008, 3 days before the Wenchuan event, which  
388 hypocenter lies in mid-crust. The strong seismo-telluric current is thought to run  
389 mainly along the Longmenshan fault and electromagnetic oscillations, induced by the  
390 current and predominated by ULF frequency band, propagate up to ionosphere and  
391 give rise to perturbations of ionospheric parameters. Some of these parameters have  
392 been investigated, such as GPS TEC and f0F2 (Yu et al., 2009; Xu et al., 2010;  
393 Akhoondzadeh et al., 2010), DEMETER satellite O+ density (Zhang et al., 2009),  
394 electron density and electron temperature (Zeng et al., 2009), and so on. Fortunately,  
395 all these study results present a climax on May 9 and this indicates a lithosphere–  
396 atmosphere–ionosphere coupling or interaction aroused by these electromagnetic  
397 signals prior to the Wenchuan event.

398 Unfortunately, at present, most of investigations put emphases on the effect of  
399 earthquakes upon the ionosphere and few of them pay attention to an inverse problem,  
400 that is the ionospheric influence on the electromagnetic waves passed through.

401 The ionosphere, as a part of the electrical conducting region of the upper  
402 atmosphere, can enhance electromagnetic fields and make the decay slow when an  
403 observation is within ionospheric range and the ionospheric effect can be up to 1-2  
404 magnitudes of the electrical fields in our simply three-layer model for some specified  
405 parameters we select.

406 Considering the Wenchuan event, the electrical signals from the lithosphere  
407 interact with the ionosphere and are improved simultaneously and then registered at  
408 1440km Gaobeidian station with the amplitude of  $1.3 \text{ mV m}^{-1}$ . This electrical field is



409 used to simulate the seismo-telluric current produced by the Wenchuan main rupture  
410 in an Earth-air-ionosphere model together with an Earth-air model. The results present  
411 that, the seismo-telluric currents with and without ionospheric effect must be about  
412  $5.3 \times 10^4$  kA and  $3.7 \times 10^5$  kA, respectively. Compared with the expected seismo-telluric  
413 current  $\sim 10$ – $100$  kA of the “Alum Rock”  $M_w=5.6$  earthquake for an observed 30 nT  
414 pulse at 1 Hz and  $D=2$  km (Bortnik et al., 2010), this result is probably in a reasonable  
415 range.

416 However, firstly, the total rupture of the Longmenshan fault ~~concerned with the~~  
417 Wenchuan main shock is extremely complicated ~~that contains~~ tenths rupture stages  
418 and several pauses, totaled 90 s for the whole rupture process ( $\sim 300$  km), according  
419 to Zhang et al.,(2009). Thus the total surface rupture  $\sim 300$  km is nevertheless not  
420 used here. While performing the analysis on only the primary 30 s, a main stage of the  
421 Wenchuan earthquake, out of 90 s as we have selected  $L=150$  km above, is expected  
422 to be representative of the majority of the rupture to generate a seismo-telluric current.  
423 Secondly, three medium are thought of as a homogeneous isotropic medium in our  
424 models and with the same average conductivity value for each one, especially for the  
425 wenchuan area. However, the Earth conductivity plays ~~a so~~ important role that can  
426 predominately affect the fluctuations of the electrical fields as shown in Fig.4  
427 although no one exactly knows the right conductivity of the bottom medium. The  
428 value  $\sigma_1 = 7.0 \times 10^{-4} \text{ S m}^{-1}$  taken part in all analysis is estimated when the  
429 observing frequency range  $f=0.1$ - $10$  Hz and the hypocenter depth  $d=19$  km of the  
430 Wenchuan main event are taken into account for the skin-depth formula. One must  
431 also mention that we use  $f=1$  Hz in our calculations because we cannot distinguish the  
432 ~~right frequency of~~ the recorded analog signals. All these can underscore our  
433 simulation results.

434 While these disadvantageous selections maybe are not so important at the same  
435 time because the key point of this paper is of ionospheric influence on  
436 electromagnetic waves and our investigation attains advantageous results.

437

## 438 6 Conclusions

439 In this paper, a three-layer (Earth-air-ionosphere) physical model, as well as a  
440 two-layer (Earth-air) model, is employed to investigate the ionospheric effect on the  
441 wave fields for a finite length dipole current source co-located with the main fault of  
442 an earthquake when an observing location distance is up to one thousand kilometers



443 or even more. For a dipole source with specified parameters of the length  $L=150$  km,  
444 the current  $I=1$  A, and the depth  $d=19$  km, the results show that all fields are free of  
445 the ionospheric effect for different frequencies in relative short ranges, e.g.,  $\sim 600$   
446 km for  $f=0.1$  Hz, which implies the ionospheric influence on electromagnetic field  
447 transmissions can be neglected within this range. However, the ionosphere can  
448 ~~strengthen~~ the field amplitude and ~~make~~ the decay ~~slow~~ when an observation is out of  
449 this range and the ionospheric effect can be up to 1-2 magnitudes of the electrical  
450 fields.

451 This is ~~suitable for~~ the 12 May 2008 Wenchuan  $M_S=8.0$  earthquake during which  
452 a strong electromagnetic signal with an amplitude of  $\sim 1.3$  mV  $m^{-1}$ , is recorded by the  
453 Gaobeidian ULF ( $f=0.1-10$  Hz) observing station 1440 km ~~away~~ from the epicenter.  
454 The main fault rupture producing a current is equivalent to a finite length dipole  
455 current source, with a nucleation depth of 19 km and a length of 150 km. Considering  
456 the Earth-air-ionosphere model, the expected current for the most typical properties of  
457 Wenchuan area is of  ~~$5.3 \times 10^4$  kA~~, which is of one magnitude smaller than the current  
458 value of  ~~$3.7 \times 10^5$  kA~~ obtained with the Earth-air model free of ionospheric effect. On  
459 the contrary, a signal introduced by a seismic activity can be advantageously recorded  
460 by a remote station under the ionospheric effect as if the detectability of the system is  
461 improved effectively.

462

463 *Acknowledgements and data.* The authors are grateful to the National Natural Science  
464 Foundation of China and this work was sponsored by the project Simulation and  
465 Interpretation of the Spatial Electromagnetic Phenomena Coupling before the  
466 Wenchuan  $M_S=8.0$  Earthquake under grant agreement n<sup>o</sup>41204057. The data presented  
467 in this paper are available to the e-mail: limeixuxl@seis.ac.cn.

468

#### 469 **References**

- 470 Akhoondzadeh, M., Parrot, M., and Saradjian M. R.: Electron and ion density  
471 variations before strong earthquakes ( $M>6.0$ ) using DEMETER and GPS data, Nat.  
472 Hazards Earth Syst. Sci., 10, 7–18, 2010.
- 473 Bernardi, A., Fraser-Smith, A. C., McGill, P. R., and Villard Jr, O. G.: Magnetic field  
474 measurements near the epicenter of the  $M_S=7.1$  Loma Prieta earthquake, Phys. Earth  
475 Planet, Interiors, 68, 45–63, 1991.
- 476 Bortnik, J., Bleier, T. E., Dunson, C., and Freund, F., Estimating the seismo-telluric  
477 current required for observable electromagnetic ground signals, Ann. Geophys., 28,



- 478 1615–1624, doi:10.5194/angeo-28-1615-2010, 2010.
- 479 Cummer, S.A.: Modeling Electromagnetic Propagation in the Earth-Ionosphere  
 480 Waveguide, *IEEE Transactions on Antennas and Propagation*, 48(9), 2–12, 2000.
- 481 Draganov, A. B., Inan, U. S., and Taranenko, Y. N.: ULF magnetic signatures at the  
 482 Earth due to groundwater flow: a possible precursor to earthquakes, *Geophys. Res.*  
 483 *Lett.*, 18, 1127–1130, 1991.
- 484 Eftaxias, K., Kapiris, P., Polygiannakis, J., Peratzakis, A., Kopanas, J., Antonopoulos,  
 485 G., and Rigas D.: Experience of short-term earthquake precursors with VLF-VHF  
 486 electromagnetic emissions, *Nat. Hazards Earth Syst. Sci.*, 3, 217–228, 2002.
- 487 Egbert, G. D.: On the generation of ULF magnetic variations by conductivity  
 488 fluctuations in a fault zone, *Pure Appl. Geophys.*, 159, 1205–1227, 2002.
- 489 Fenoglio, M. A., Johnston, M. J. S., and Byerlee J. D.: Magnetic and electric fields  
 490 associated with changes in high pore pressure in fault zones: application to the  
 491 Loma Prieta ULF emissions, *J. Geophys. Res.*, 100 (12), 951–958, 1995.
- 492 Fraser-Smith, A. C., Bernardi, A., McGill, P. R., Ladd, M. E., Helliwell, R. A., and  
 493 Villard Jr, O. G.: Low-frequency magnetic measurements near the epicenter of the  
 494 *M*<sub>s</sub> 7.1 Loma Prieta earthquake, *Geophys. Res. Lett.*, 17, 1465–1468, 1990.
- 495 Freund, F., and Sornette, D.: Electro-magnetic earthquake bursts and critical rupture  
 496 of peroxy bond networks in rocks, *Tectonophysics*, 431, 33–47, 2007.
- 497 Freund, F.: Charge generation and propagation in igneous rocks, *J. Geodynamics*, 33,  
 498 543–570, 2002.
- 499 Freund, F.: Stress-activated positive hole charge carriers in rocks and the generation  
 500 of pre-earthquake signals, in: *Electromagnetic Phenomena Associated with*  
 501 *Earthquakes*, edited by: Hayakawa, M., Transworld Research Network, Trivandrum,  
 502 India, Chapter 3, 41–96, 2009.
- 503 Freund, F.: Toward a unified solid state theory for pre-earthquake signals, *Acta*  
 504 *Geophys.*, 58(5), 719–766, 2010.
- 505 Fu, C. M., Di, Q. Y., Xu, C., and Wang, M. Y.: Electromagnetic fields for different  
 506 type sources with effect of the ionosphere, *Chinese J. Geophys.*, 55(12), 3958–3968,  
 507 doi: 10. 6038/ j. issn. 0001-5733. 2012. 12. 008, 2012(in Chinese with English  
 508 abstract).
- 509 Guan, H. P., Han, F.Y., Xiao, W. J., and Chen, Z.Y.: ULF electromagnetic  
 510 observation and data processing methods, *Earthquake*, 23(2), 5–93, 2003(in  
 511 Chinese with English abstract).
- 512 Hao, J. Q., Qian, S. Q., Zhou, J. G., and Zhu, T.: ULF electric and magnetic  
 513 anomalies accompanying the cracking of rock sample, *Acta Seismologica sinica*,  
 514 25(1), 102–111, 2003 (in Chinese with English abstract).
- 515 Hayakawa, M., and Molchanov, O. A. (Eds.): *Seismo-Electromagnetics:*



- 516 Lithosphere-Atmosphere-Ionosphere Coupling, p. 477. Tokyo, Japan:  
517 TERRAPUB, 2002.
- 518 Key, K.: 1D inversion of multicomponent, multi-frequency marine CSEM data:  
519 Methodology and synthetic studies for resolving thin resistive layers, *Geophysics*,  
520 74(2), F9–F20, 2009.
- 521 Kopytenko, Y. A., Matiashvili, T. G., Voronov, P. M., Kopytenko, E. A., and  
522 Molchanov, O. A.: Detection of ultra-low frequency emissions connected with the  
523 Spitak earthquake and its aftershock activity, based on geomagnetic pulsations data  
524 at Dusheti and Vardzia observatories, *Phys. Earth Planet. Interiors*, 77, 85–95,  
525 1993.
- 526 Kuo, C. L., Huba, J. D., Joyce, G., and Lee, L. C.: Ionosphere plasma bubbles and  
527 density variations induced by pre-earthquake rock current and associated surface  
528 charges, *J. Geophys. Res.*, 116(10), A10317, doi:10.1029/2011JA016628, 2011.
- 529 Li, M., Lu, J., Parrot, M., Tan, H., and Zhang, X.: Review of unprecedented ULF  
530 electromagnetic anomalous emissions possibly related to the Wenchuan  $M_S = 8.0$   
531 earthquake, on 12 May 2008. *Nat. Hazards Earth Syst. Sci.*, 13(2), 279–286,  
532 doi: 10.5194/nhess-13-279-2013, 2013.
- 533 Li, D., Di, Q. Y., and Wang, M. Y.: One-dimensional electromagnetic fields forward  
534 modeling for “earth–ionosphere” mode. *Chinese J. Geophys.*, 54(9), 2375–2388,  
535 doi: 10.3969/j.issn.0001-5733.2011.09.021, 2011 (in Chinese with English  
536 abstract).
- 537 Li, Y., Lin, P. R., Zheng, C. J., Shi, F. S., Xu, B. L., and Guo, P.: The electromagnetic  
538 response modeling of the ELF method and the influence of the ionosphere,  
539 *Geophysical & Geochemical Exploration*, 34(3), 332–339, 2010a, (in Chinese with  
540 English abstract).
- 541 Li, D. Q., Di, Q. Y., and Wang, M. Y.: Study of large scale large power control source  
542 electromagnetic with “Earth–ionosphere” mode, *Chinese J. Geophys.*, 53(2), 411–  
543 420, doi: 10.3969/j.issn.0001-5733.2010.02.019, 2010b, (in Chinese with  
544 English abstract).
- 545 Molchanov, O. A., Kopytenko, Y. A., Voronov, P. M., Kopytenko, E. A., Matiashvili, T.  
546 G., Fraser-Smith, A. C., and Bernardi, A.: Results of ULF Magnetic field  
547 measurements near the epicenters of the Spitak ( $M_S 6.9$ ) and Loma Prieta ( $M_S 7.1$ )  
548 earthquakes: comparative analysis, *Geophys. Res. Lett.*, 19, 1495–1498, 1992.
- 549 Molchanov, O. A., Fedorov, E., Schekotov, A., Gordeev, E., Chebrov, V., Surkov,  
550 V., ..., Biagi, P. F.: Lithosphere-atmosphere-ionosphere coupling as governing  
551 mechanism for preseismic short-term events in atmosphere and ionosphere, *Natural*  
552 *Hazards Earth Syst. Sci.*, 4, 757–767, 2004.
- 553 Panfilov, A. A.: The results of experimental studies of VLF–ULF electromagnetic





- 554 emission by rock samples due to mechanical action, *Nat. Hazards Earth Syst. Sci.*,  
555 14, 1383–1389, doi:10.5194/nhess-14-1383-2014, 2014.
- 556 Park, S. K.: Precursors to earthquakes: seismo-electromagnetic signals, *Surv.*  
557 *Geophys.*, 17, 493–516, 1996.
- 558 Pulinets, S. A., and Ouzounov, D.: Lithosphere-Atmosphere-Ionosphere Coupling  
559 (LAIC) model-An unified concept for earthquake precursors validation, *J.*  
560 *Southeast Asian Earth Sci.*, 41(4–5): 371–382, 2011.
- 561 Pulinets, S. A., Boyarchuk, K. A., Hegai, V. V., Kim, V. P., and Lomonosov, A. M.:  
562 Quasielectrostatic model of atmosphere-thermosphere-ionosphere coupling, *Adv.*  
563 *Space Res.*, 26, 1209–1218, 2000.
- 564 Qian, S. Q., Ren, K. X., and Lü Z.: Experimental study on VLF, MF, HF and VHF  
565 electromagnetic radiation characteristics with the rock breaking, *Earthquake*  
566 *Science*, 18(3), 346–351, 1996 (in Chinese with English abstract).
- 567 Qian, S. Q., Hao, J. Q., Zhou, J. G., and Gao, J. T.: Precursory Electric and Magnetic  
568 Signals at ULF and LF Bands during the Fracture of Rocks under Pressure.  
569 *Earthquake Research in China*, 19(2), 109–116, 2003 (in Chinese with English  
570 abstract).
- 571 Sarlis, N., Lazaridou, M., Kaporis, P., and Varotsos, P.: Numerical model of the  
572 selectivity effect and the V/L criterion, *Geophys. Res. Lett.*, 26, 3245–3248, 1999.
- 573 Simpson, J. J., and Taflove, A.: Electrokinetic effect of the Loma Prieta earthquake  
574 calculated by an entire-Earth FDTD solution of Maxwell's equations. *Geophys. Res.*  
575 *Lett.*, 32, L09302, doi: 10.1029/2005GL022601, 2005.
- 576 Varotsos, P., and Lazaridou, M.: Latest aspects of earthquake prediction in Greece  
577 based on seismic electric signals. *Tectonophysics*, 188, 321–347, 1991.
- 578 Varotsos, P., Sarlis, N., and Lazaridou, M.: Transmission of stress induced electric  
579 signals in dielectric media, Part II, *Acta Geophys.*, 48, 141–177, 2000.
- 580 Varotsos, P., Sarlis, N., Skordas, E., Tanaka, H., and Lazaridou, M.: Additional  
581 evidence on some relationship between seismic electric signals and earthquake  
582 source parameters, *Acta Geophys.*, 53, 293–298, 2005.
- 583 Wait, J. R.: *Geo-electromagnetism*: Academic Press, 1982.
- 584 Wait, J. R.: Some Factors Concerning Electromagnetic Wave Propagation in the  
585 Earth's Crust, *Proc. IEEE*, 54(8), August 1966.
- 586 Xu, C., Di, Q. Y., Fu, C. M. and Wang, M. Y.: The contrast of response  
587 characteristics between large power long dipole and circle source, *Chinese J.*  
588 *Geophys.*, 55(6), 2097–2104, doi: 10.6038/j.issn.0001-5733.2012.06.03, 2012,  
589 (in Chinese with English abstract).
- 590 Xu, T., Hu, Y., Wu, J., Wu, Z., Suo, Y., and Feng, J.: Giant disturbance in the  
591 ionospheric F2 region prior to the *M*8.0 Wenchuan earthquake on 12 May 2008,



- 592 Ann. Geophys., 28, 1533–1538, 2010.
- 593 Xu, X. W.: Album of 5.12 Wenchuan 8.0 earthquake surface ruptures. Seismological  
594 press, 2009 (in Chinese with English abstract).
- 595 Yamauchi, T., Maekawa, S., Horie, T., Hayakawa, M., and Soloviev, O.:  
596 Subionospheric VLF/LF monitoring of ionospheric perturbations for the 2004  
597 Mid-Niigata earthquake and their structure and dynamics, *J. Atmos. Sol. Terr.*  
598 *Phys.*, 69, 793–802, 2007.
- 599 Yu, T., Mao, T., Wang, Y. G., and Wang, J. S.: Study of the ionospheric anomaly  
600 before the Wenchuan earthquake, *Chinese Science Bulletin*, 54(6): 1086–1092, doi:  
601 10.1007/s11434-008-0587-8, 2009 (in Chinese with English abstract).
- 602 Zeng, Z. C., Zhang, B., Fang, G. Y., Wang, D. F., and Yin, H. J.: The analysis of  
603 ionospheric variations before Wenchuan earthquake with DEMETER data, *Chinese*  
604 *J. Geophys.*, 52(1): 11–19, 2009 (in Chinese with English abstract).
- 605 Zhang, X., Shen, X., Liu, J., Ouyang, X., Qian, J., and Zhao, S.: Analysis of  
606 ionospheric plasma perturbations before Wenchuan earthquake. *Nat. Hazards Earth*  
607 *Syst. Sci.*, 9: 1259–1266, 2009.
- 608 Zhang, Y., Feng, W. P., Xu, L. S., Zhou, C. H., and Chen, Y. T.: Spatio-temporal  
609 rupture process of the 2008 great Wenchuan earthquake, *Science in China Series D:*  
610 *Earth Sciences*, 52 (2), 145–154, 2009.
- 611 Zhu, Y. T., Wang, X. B., Yu, N., Gao, S. Q., Li, K., and Shi, Y. J.: Longmenshan  
612 magnetotelluric deep structure and the Wenchuan earthquake ( $M_S8.0$ ), *Acta*  
613 *Geologica Sinica*, 82 (12), 1769–777, 2008 (in Chinese with English abstract).
- 614
